# Supplementary material
Source: PubMed Central journal article supplement (PMC3989673)
Supplement: embr0015-0419-sd2.pdf [file embr0015-0419-sd2.pdf]

# Bielli\_Supplemental Figure 1

**A**

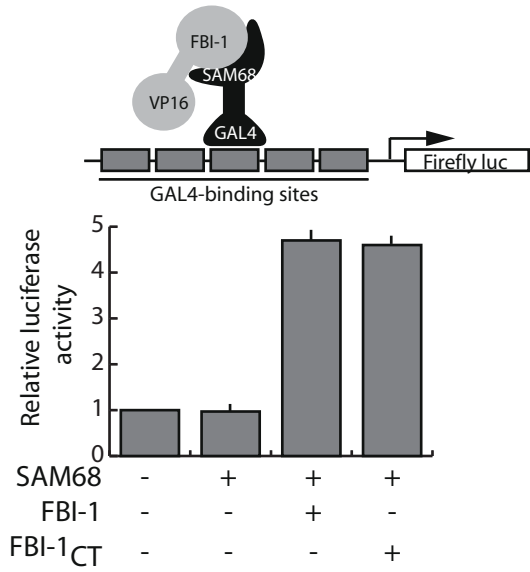

**B**

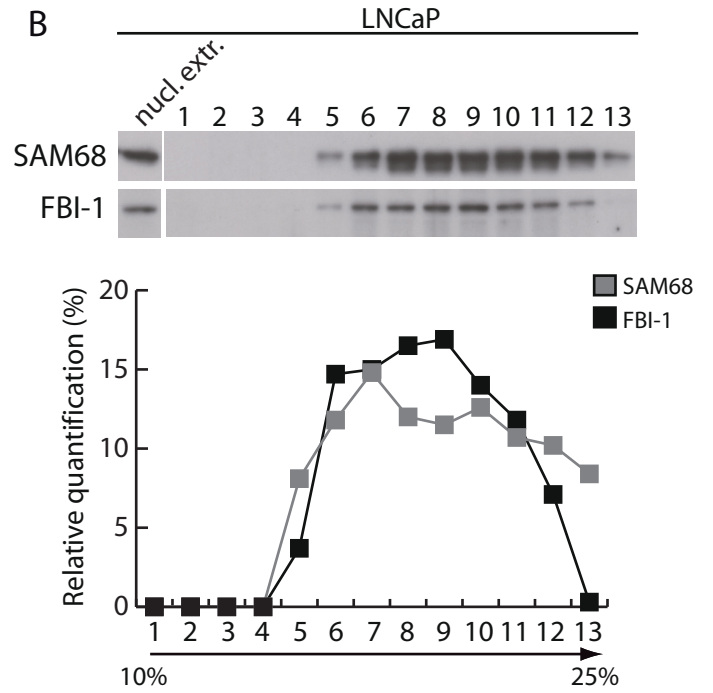

**C**

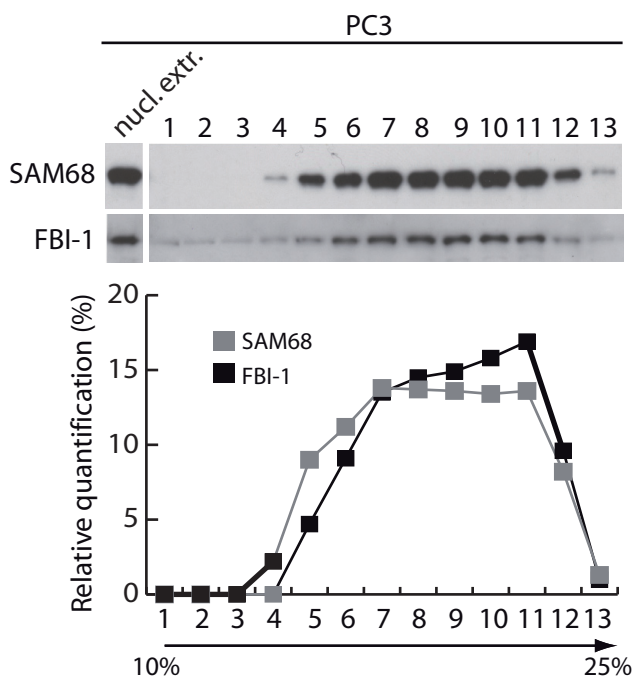

**D**

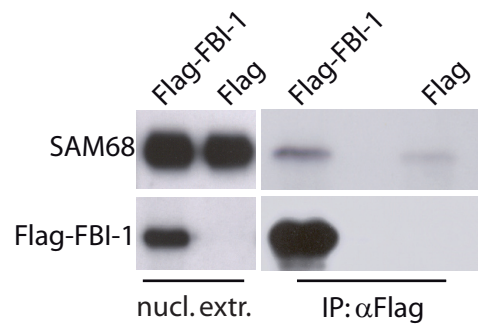

**Supplemental Figure 1. FBI-1 is a novel SAM68 interacting protein.** A) Two-hybrid mammalian analysis (*upper panel*) of the interaction between SAM68 and FBI-1 or its C-terminal domain (aa 274 to 584; FBI-1<sub>CT</sub>). HEK293T cells were co-transfected with pBIND-Gal4-SAM68 and pACT-VP16-FBI-1 or -FBI-1<sub>CT</sub> plasmids, in the presence of the pG5luc vector. The bar graph represents the ratio between firefly and renilla luciferase activity [mean  $\pm$  standard deviation (SD), n=3]. B-C) Western blot analyses of sucrose gradient fractionation of nuclear extracts from LNCaP cells (B) or PC3 cells (C) using anti-SAM68 and anti-FBI-1 antibodies. Fraction 1 represents the bottom of the gradient. D) Western blot analysis of endogenous SAM68 and Flag-FBI-1 immunoprecipitated using anti-Flag from nuclear extracts of HEK293T expressing Flag-FBI-1 or empty vector (Flag).
