# Supplementary material
Source: PubMed Central journal article supplement (PMC3989673)
Supplement: embr0015-0419-sd4.pdf [file embr0015-0419-sd4.pdf]

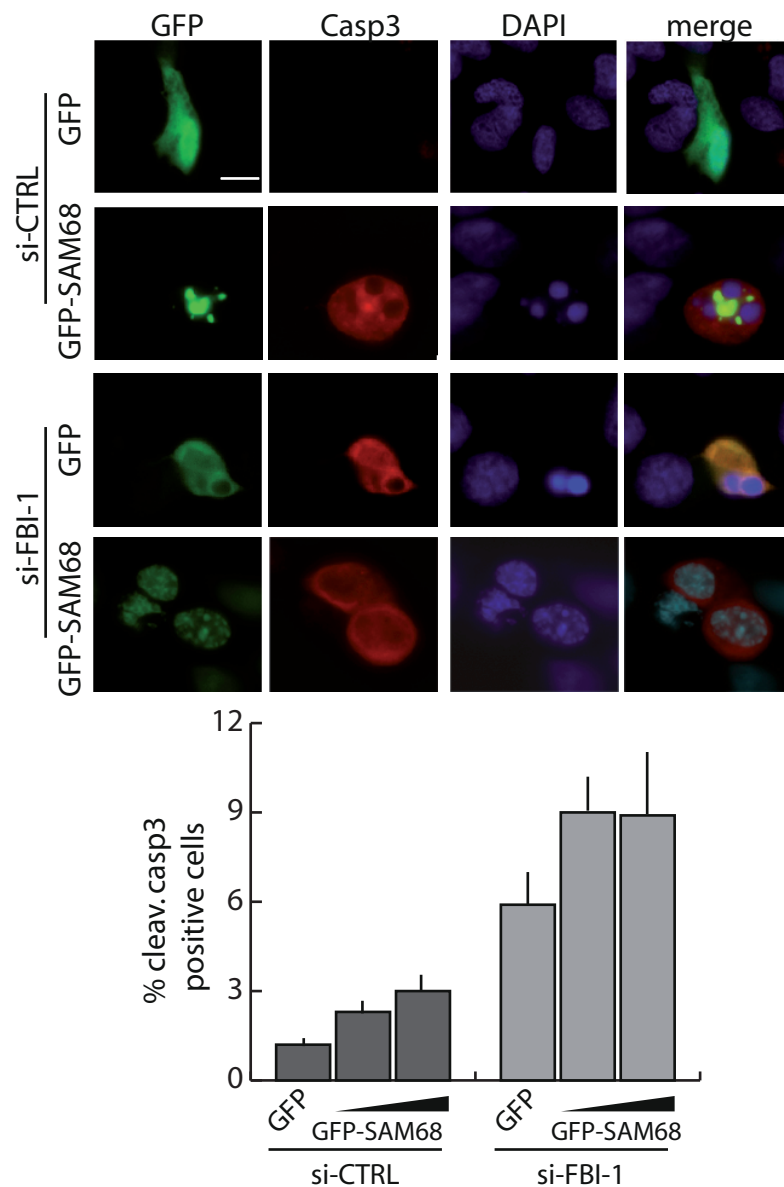

**Supplemental Figure 3. Downregulation of FBI-1 promotes SAM68-mediated apoptosis in PCa cells.** Analysis of apoptosis by measuring activated (cleaved) caspase 3. LNCaP cells transfected with FBI-1 (si-FBI-1) or control (si-CTRL) si-RNAs were then transfected with increasing amounts of GFP-SAM68 and analysed by immunofluorescence for the activated (cleaved) caspase 3. The bar graphs represent the analysis of apoptotic cells (scored as cells positive for activated (cleaved) caspase-3 staining within the GFP positive cell population). Results represent the mean  $\pm$  SD of three experiments. Representative images of the immunofluorescence analysis are shown. Scale bar = 10  $\mu$ m.
