# Supplementary material
Source: PubMed Central journal article supplement (PMC3989673)
Supplement: embr0015-0419-sd6.pdf [file embr0015-0419-sd6.pdf]

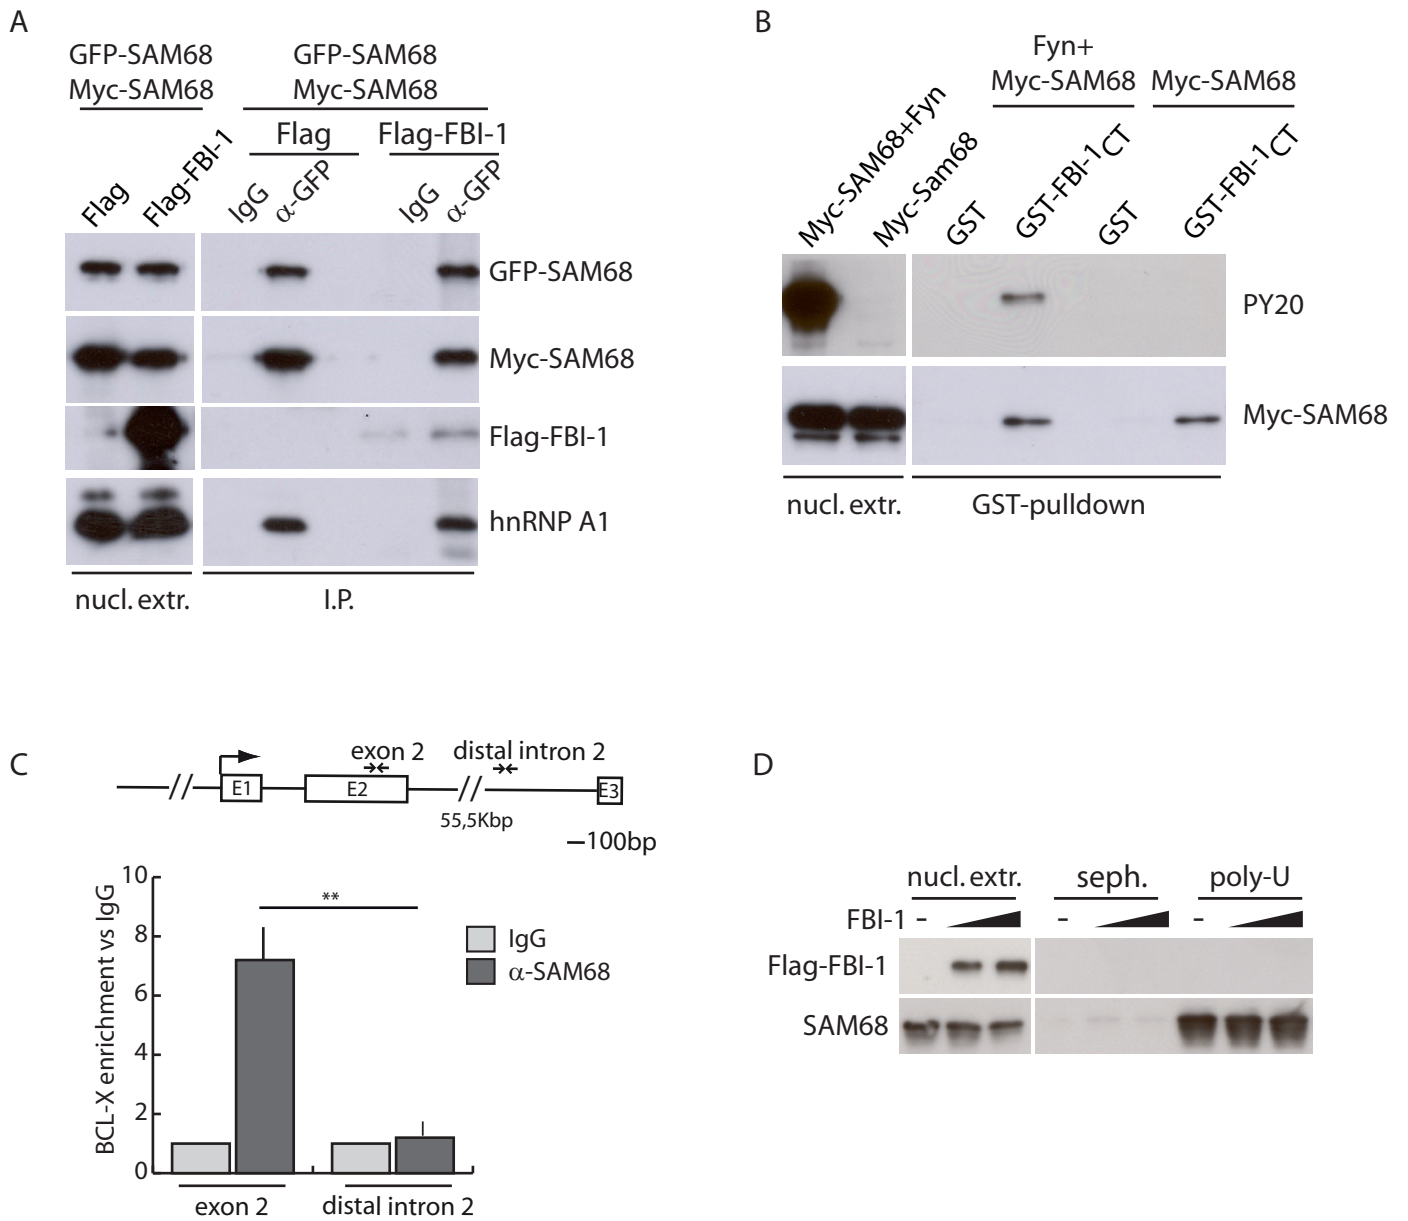

**Supplemental Figure 5. FBI-1 does not affect SAM68 homodimerization and protein-protein interactions.** A) Western blot analysis of the co-IP between GFP-SAM68 and Myc-SAM68 in presence or not of Flag-FBI-1. Nuclear extracts from HEK293T cells expressing GFP-SAM68 and Myc-SAM68 with or without Flag-FBI were immunoprecipitated using anti-GFP or rabbit IgGs as control. B) Western blot analysis of Myc-SAM68 and tyrosine phosphorylation (PY20) in pull-down assay performed using the GST-FBI-1<sub>CT</sub> fusion protein and cell extract of HEK293T expressing Myc-SAM68 in presence or not of FYN. C) CLIP analysis of endogenous SAM68. Associated *BCL-X* RNA was quantified by qRT-PCR using primers indicated in the upper scheme. Data represent the fold enrichment relative to the IgG sample. D) Pull-down assay of endogenous SAM68 using poly-U sepharose, or sepharose (Seph.) beads as control, and nuclear extract of HEK293T cells transfected with increasing amount of Flag-FBI-1. Bound proteins were separated on SDS-PAGE and analysed by Western-blot using the anti-Flag and anti-SAM68 antibodies
