# Supplementary material
Source: PubMed Central journal article supplement (PMC3989673)
Supplement: embr0015-0419-sd7.pdf [file embr0015-0419-sd7.pdf]

**Supplemental Table 1. List of the oligonucleotides used as PCR primers in this study.**

| (#) | Oligonucleotide name              | Sequence 5'→3'                                   | Experiment                    |
|-----|-----------------------------------|--------------------------------------------------|-------------------------------|
| 1   | FBI-1/SalI/Fw                     | aggctgacatggccggcgtggacg                         | Cloning                       |
| 2   | FBI-1/XbaI/Rv                     | agtctagattaggcagtcggctgtgaag                     | Cloning                       |
| 3   | FBI-1 <sub>274-584</sub> /SalI/Fw | aggctgacttcgcgccggagaggaggc                      | Cloning                       |
| 4   | SAM68/365/EcoRI/Fw                | aggaattcacatacgaagattatggatatg                   | Cloning                       |
| 5   | SAM68/SalI/Rv                     | aggctgacttaataacgtccatatggatgctc                 | Cloning                       |
| 6   | SAM68/351/EcoRI/Fw                | aggaattcggcatccagaggatacct                       | Cloning                       |
| 7   | SAM68/400/SalI/Rv                 | aggctgacttatccatagtcataaactct                    | Cloning                       |
| 8   | SAM68/434/SalI/Rv                 | aggctgacttatgctccctcactggc                       | Cloning                       |
| 9   | SAM68/EcoRI/Fw                    | aggaattcatgcagcggcgacatcctgcc                    | Cloning                       |
| 10  | SAM68/Δ400-420/Fw                 | gactcagaatattatgactatccgtcgtgaaggccccctcctgctagg | Cloning                       |
| 11  | FBI-1/EcoRI/Fw                    | aggaattcatggccggcggcgtggacg                      | Cloning                       |
| 12  | FBI-1/SalI/RV                     | aggctgacttagcggagtcggctgtgaag                    | Cloning                       |
| 13  | FBI-1/ aa274/EcoRI/Fw             | aggaattccgcgccggagaggaggagc                      | Cloning                       |
| 14  | FBI-1/ aa276/SalI/Rv              | aggctgacttatcccccggcctagtg                       | Cloning                       |
| 15  | SAM68/pBIND/SalI/Fw               | aggctgacttatgcagcggcgacgacc                      | Cloning                       |
| 16  | SAM68/pBIND/NotI/Rv               | agtgcggcccttaataacgtccatatg                      | Cloning                       |
| 17  | FBI-1/ aa274/SalI/pACT/Fw         | aggctgacttcgcgccggagaggaggagc                    | Cloning                       |
| 18  | SAM68/pEGFPC1/EcoRI/Fw            | aggaattctatgcagcggcgacgacc                       | Cloning                       |
| 19  | p14ARF/XhoI                       | agctcgagaaaataagggaataggggagcg                   | Cloning                       |
| 20  | p14ARF/HindIII                    | agaagctccagaggtgagcagcgccactcctgcc               | Cloning                       |
| 21  | Δ1-500/XhoI/Fw                    | agctcgagatgtggaagagaacagg                        | Cloning                       |
| 22  | FBI-1/mut1/Rv                     | tgatggcactgaaaactccatctccg                       | Cloning                       |
| 23  | FBI-1/mut2/Rv                     | tccttctaagaactaagtctctgttc                       | Cloning                       |
| 24  | Exon2/Fw                          | ccatggcagcagtaaagcaa                             | BCL-X minigene splicing assay |
| 25  | BGH/Rv                            | cagtgaggatggcacccttc                             | BCL-X minigene splicing assay |
| 26  | BCL-X/ATG/Fw                      | atgtctcagagcaaccgggagctg                         | Endogenous BCL-X Fig.3A       |
| 27  | BCL-X/TGA/Rv                      | tcatttccgactgaagagtgagcc                         | Endogenous BCL-X Fig.3A       |
| 28  | BCL-X/Exon2_short/Fw              | ccagggacagcatatcaga                              | Fig.5A,5E                     |
| 29  | BCL-X/Exon2_short/RV              | gctgtccctggggtgatgtgg                            | Fig.5A,5E                     |
| 30  | BCL-X Long Exon Junction Fw       | aagagaacggcggctgggatac                           | Fig.3B                        |
| 31  | BCL-X Short Exon Junction Fw      | gggacagcatatcagagctttgaacaggatac                 | Fig.3B                        |
| 32  | BCL-X Exon Junction Rv            | tcatttccgactgaagagtgagccca                       | Fig.3B                        |
| 33  | siFBI-1                           | cgcagaagguggagaagaa                              | Silencing of FBI-1            |
